# Supplementary material for: Using Sparfloxacin-Capped Gold Nanoparticles to Modify a Screen-Printed Carbon Electrode Sensor for Ethanol Determination
Source: MDPI journal article supplement (doi:10.3390/s23198201), 2023-09-30
Supplement: s1 [file s1]

*Supplementary Details*

# Using Sparfloxacin-Capped Gold Nanoparticles to Modify a Screen-Printed Carbon Electrode Sensor for Ethanol Determination

Vasanth Magesh <sup>1,†</sup>, Vishaka S. Kothari <sup>1,†</sup>, Dhanraj Ganapathy <sup>1</sup>, Raji Atchudan <sup>2,†</sup>, Sandeep Arya <sup>3</sup>, Deepak Nallaswamy <sup>1</sup> and Ashok K. Sundramoorthy <sup>1,\*</sup>

<sup>1</sup> Centre for Nano-Biosensors, Department of Prosthodontics, Saveetha Institute of Medical and Technical Sciences, Saveetha Dental College and Hospitals, 162 Poonamallee High Road, Velappanchavadi, Chennai 600077, India

<sup>2</sup> School of Chemical Engineering, Yeungnam University, Gyeongsan 38541, Republic of Korea

<sup>3</sup> Department of Physics, University of Jammu, Jammu 180006, India

\* Correspondence: ashok.sundramoorthy@gmail.com

† These authors contributed equally.

## Supporting Figures:

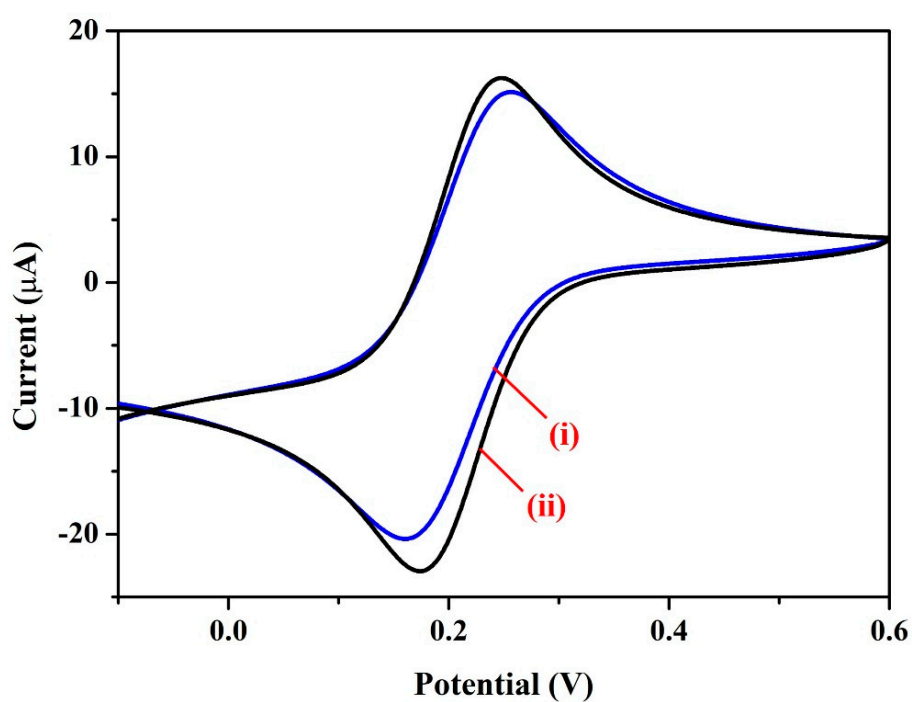

**Figure S1.** Cyclic voltammograms (CV) were recorded using (i) bare SPE and (ii) A-SPE (activated SPE) in 0.1 M KCl containing 2 mM  $[\text{Fe}(\text{CN})_6]^{3-}$  at a scan rate of 50  $\text{mV s}^{-1}$ .

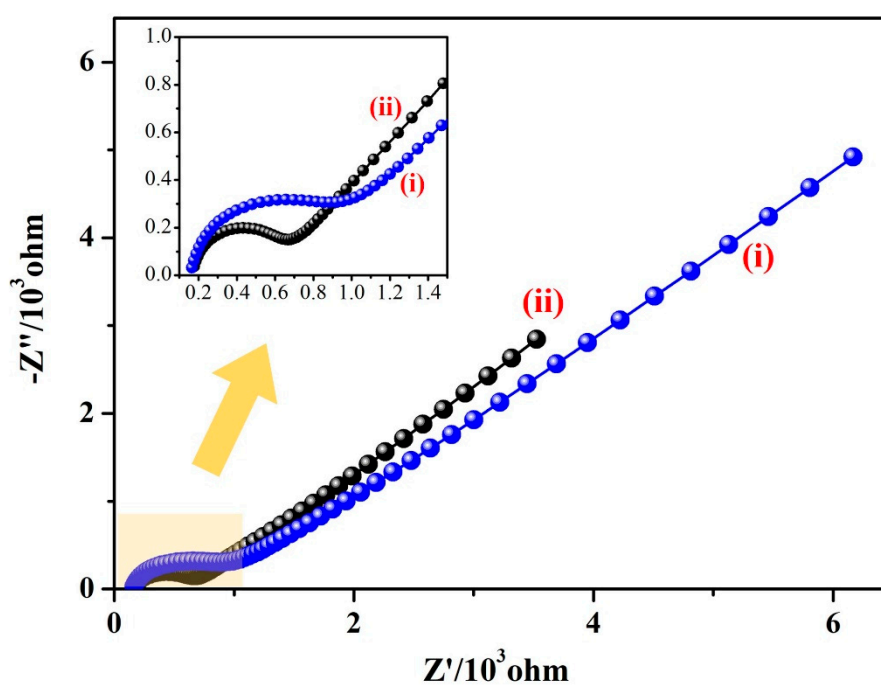

**Figure S2.** EIS spectrum of (i) bare SPE and (ii) A-SPE in 0.1 M KCl containing 2 mM  $[\text{Fe}(\text{CN})_6]^{3-}$  at an amplitude of 5 mV. Inset: Enlarged image of highlighted portion in Figure S2.
